# Supplementary material for: Green synthesis of highly luminescent biotin-conjugated CdSe quantum dots for bioimaging applications
Source: Royal Society of Chemistry journal article supplement (doi:10.1039/d0nj03075a), 2020-01-01
Supplement: d0nj03075a1.pdf [file d0nj03075a1.pdf]

## Supporting Information

### Green synthesis of highly luminescent biotin conjugated CdSe Quantum Dot for bioimaging application<sup>†</sup>

M. VijayaBharathi,<sup>[a, b]</sup> Nilmadhab Roy, Prithvi Moharana, Kaustab Ghosh,<sup>\*[a]</sup> Priyankar Paira<sup>\*[b]</sup>

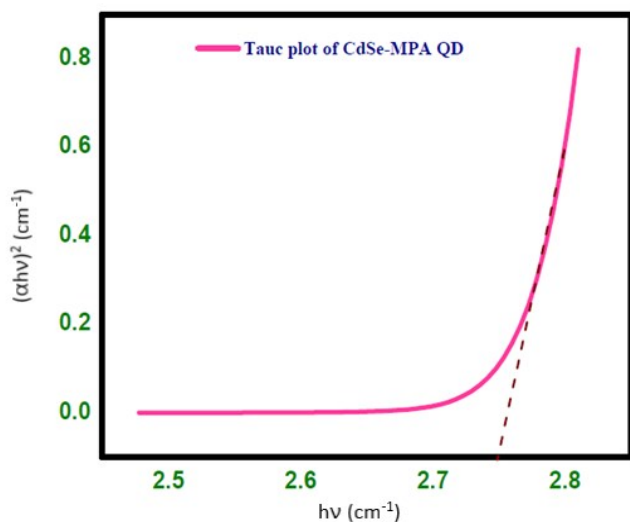

Fig. S1 Tauc graph of CdSe-MPA QD

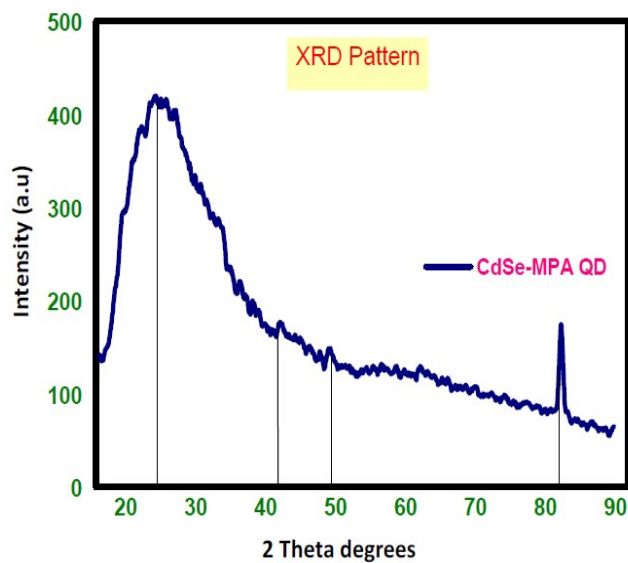

Fig. S2 XRD pattern of CdSe-MPA QD
